# Supplementary material for: Red Rice Seed Coat Targeting SPHK2 Ameliorated Alcoholic Liver Disease via Restored Intestinal Barrier and Improved Gut Microbiota in Mice
Source: MDPI journal article supplement (doi:10.3390/nu15194176), 2023-09-27
Supplement: s1 [file s1]

**Table S1. Compounds of RRA.** 26 compounds of RRA were selected in the result of widely targeted component analysis.

| Compounds                                                           | Ionization model   | Class I        | Class II         | Q1 (Da)  | Q3 (Da)  | CAS        |
|---------------------------------------------------------------------|--------------------|----------------|------------------|----------|----------|------------|
| 7-Hydroxyflavone                                                    | [M+H] <sup>+</sup> | Flavonoids     | Flavones         | 137.02   | 238.063  | 6665-86-7  |
| Ferulic acid                                                        | [M-H] <sup>-</sup> | Phenolic acids | Phenolic acids   | 134.04   | 194.0579 | 537-98-4   |
| Sinapic acid                                                        | [M-H] <sup>-</sup> | Phenolic acids | Phenolic acids   | 193.02   | 224.0685 | 530-59-6   |
| 3,4-Dihydroxybenzoic acid (Protocatechuic acid)                     | [M-H] <sup>-</sup> | Phenolic acids | Phenolic acids   | 109.03   | 154.0266 | 99-50-3    |
| Syringic acid                                                       | [M-H] <sup>-</sup> | Phenolic acids | Phenolic acids   | 123.01   | 198.0528 | 530-57-4   |
| Chlorogenic acid (3-O-Caffeoylquinic acid)(3-O-Caffeoylquinic acid) | [M-H] <sup>-</sup> | Phenolic acids | Phenolic acids   | 191.06   | 354.0951 | 327-97-9   |
| Linoleic acid                                                       | [M-H] <sup>-</sup> | Lipids         | Free fatty acids | 59.01    | 280.2402 | 60-33-3    |
| $\alpha$ -Linolenic Acid                                            | [M-H] <sup>-</sup> | Lipids         | Free fatty acids | 277.22   | 278.2246 | 463-40-1   |
| Apigenin; 4',5,7-Trihydroxyflavone                                  | [M+H] <sup>+</sup> | Flavonoids     | Flavones         | 153.02   | 270.0528 | 520-36-5   |
| Palmitic acid                                                       | [M-H] <sup>-</sup> | Lipids         | Free fatty acids | 237.22   | 256.2402 | 57-10-3    |
| Docosanoic acid (Behenic acid)                                      | [M-H] <sup>-</sup> | Lipids         | Free fatty acids | 183.17   | 340.3341 | 112-85-6   |
| Epicatechin                                                         | [M+H] <sup>+</sup> | Flavonoids     | Flavanols        | 139.04   | 290.079  | 490-46-0   |
| IsoFerulic Acid                                                     | [M-H] <sup>-</sup> | Phenolic acids | Phenolic acids   | 134.0374 | 194.0579 | 25522-33-2 |
| Vanillic acid                                                       | [M-H] <sup>-</sup> | Phenolic acids | Phenolic acids   | 108.02   | 168.0423 | 121-34-6   |
| Isovanillin                                                         | [M+H] <sup>+</sup> | Phenolic acids | Phenolic acids   | 65.04    | 152.0473 | 621-59-0   |
| 1-Linoleoylglycerol                                                 | [M+H] <sup>+</sup> | Lipids         | Glycerol ester   | 263.24   | 354.277  | 2277-28-3  |
| Methyl linolenate                                                   | [M+H] <sup>+</sup> | Lipids         | Free fatty acids | 95.09    | 292.2402 | 301-00-8   |
| Diisobutyl phthalate                                                | [M+H] <sup>+</sup> | Phenolic acids | Phenolic acids   | 149.0233 | 278.1518 | 84-69-5    |
| Hydroperoxylinoleic acid                                            | [M-H] <sup>-</sup> | Lipids         | Free fatty acids | 223.17   | 312.2301 | 34444-18-3 |
| Elaidic Acid                                                        | [M-H] <sup>-</sup> | Lipids         | Free fatty acids | 281.25   | 282.2559 | 112-79-8   |
| (7Z)-Hexadecenoic acid                                              | [M-H] <sup>-</sup> | Lipids         | Free fatty acids | 235.21   | 254.2246 | 2416-19-5  |
| 10-Hydroxystearic Acid                                              | [M-H] <sup>-</sup> | Lipids         | Free fatty acids | 141.13   | 300.2664 | 638-26-6   |
| Hydroxyicosanoic Acid                                               | [M-H] <sup>-</sup> | Lipids         | Free fatty acids | 59.01    | 328.2977 | -          |
| Catechin-catechin-catechin                                          | [M-H] <sup>-</sup> | Flavonoids     | Flavanols        | 407.1    | 866.2058 | -          |
| p-Coumaric acid ethyl ester                                         | [M+H] <sup>+</sup> | Phenolic acids | Phenolic acids   | 147.04   | 192.0786 | 7362-39-2  |
| Malvidin-3-O-galactoside (Primulin)                                 | [M] <sup>+</sup>   | Flavonoids     | Anthocyanidins   | 331.08   | 493.1341 | 30113-37-2 |

**Table S2. Potential molecular targets of compounds in RRA.** In Swiss Target Prediction database, 320 potential molecular targets of 26 compounds were collected.

| Compound         | Target Gene | ChEMBL ID     | Uniprot ID | Probability* | Known actives (3D/2D) |
|------------------|-------------|---------------|------------|--------------|-----------------------|
| 7-Hydroxyflavone | Adora1      | CHEMBL3688    | Q60612     | 0.198808518  | 258 / 23              |
| 7-Hydroxyflavone | Adora2a     | CHEMBL2115    | Q60613     | 0.198808518  | 194 / 11              |
| 7-Hydroxyflavone | Hsd17b2     | CHEMBL1914270 | P51658     | 0.117056358  | 12 / 2                |
| 7-Hydroxyflavone | Alox5       | CHEMBL5211    | P48999     | 0.108018051  | 45 / 47               |
| 7-Hydroxyflavone | Tnks        | CHEMBL3232702 | Q6PFX9     | 0.108018051  | 14 / 28               |
| 7-Hydroxyflavone | Bche        | CHEMBL2528    | Q03311     | 0.098947479  | 12 / 3                |
| 7-Hydroxyflavone | Ca7         | CHEMBL2216    | Q9ERQ8     | 0.080792387  | 48 / 8                |
| 7-Hydroxyflavone | Ache        | CHEMBL3198    | P21836     | 0.080792387  | 37 / 24               |
| 7-Hydroxyflavone | Tnks2       | CHEMBL3232703 | Q3UES3     | 0.080792387  | 16 / 12               |
| 7-Hydroxyflavone | Tyr         | CHEMBL5346    | P11344     | 0.080792387  | 0 / 3                 |
| 7-Hydroxyflavone | Alox12      | CHEMBL3225    | P39655     | 0.071715932  | 11 / 9                |
| 7-Hydroxyflavone | Abcb1a      | CHEMBL2573    | P21447     | 0.071715932  | 11 / 42               |
| 7-Hydroxyflavone | Abcb1b      | CHEMBL3467    | P06795     | 0.071715932  | 11 / 39               |
| 7-Hydroxyflavone | Mmp9        | CHEMBL2214    | P41245     | 0.062621967  | 11 / 2                |
| 7-Hydroxyflavone | Mmp2        | CHEMBL3095    | P33434     | 0.062621967  | 16 / 2                |
| 7-Hydroxyflavone | Gsk3b       | CHEMBL1075321 | Q9WV60     | 0.062621967  | 139 / 8               |
| 7-Hydroxyflavone | Maoa        | CHEMBL3681    | Q64133     | 0.062621967  | 74 / 25               |
| 7-Hydroxyflavone | Aurkb       | CHEMBL1075275 | O70126     | 0.062621967  | 25 / 4                |
| 7-Hydroxyflavone | Cdk1        | CHEMBL4084    | P11440     | 0.062621967  | 34 / 10               |
| 7-Hydroxyflavone | Ar          | CHEMBL3056    | P19091     | 0.062621967  | 25 / 16               |
| 7-Hydroxyflavone | Maob        | CHEMBL3050    | Q8BW75     | 0.062621967  | 141 / 29              |
| 7-Hydroxyflavone | Pla2g1b     | CHEMBL4378    | Q9Z0Y2     | 0.062621967  | 0 / 1                 |
| 7-Hydroxyflavone | Mmp13       | CHEMBL3638350 | P33435     | 0.062621967  | 13 / 1                |
| 7-Hydroxyflavone | Egfr        | CHEMBL3608    | Q01279     | 0.062621967  | 460 / 24              |
| 7-Hydroxyflavone | Prkdc       | CHEMBL2176779 | P97313     | 0.053556076  | 36 / 8                |
| 7-Hydroxyflavone | Bace1       | CHEMBL4593    | P56818     | 0.053556076  | 269 / 12              |
| 7-Hydroxyflavone | Lck         | CHEMBL2480    | P06240     | 0.053556076  | 49 / 3                |
| 7-Hydroxyflavone | Esr2        | CHEMBL2995    | O08537     | 0.053556076  | 19 / 33               |
| 7-Hydroxyflavone | Pik3cg      | CHEMBL2189158 | Q9JHG7     | 0.053556076  | 57 / 1                |
| 7-Hydroxyflavone | Abcc1       | CHEMBL2532    | O35379     | 0.053556076  | 1 / 11                |
| 7-Hydroxyflavone | F2          | CHEMBL1075308 | P19221     | 0.053556076  | 32 / 3                |
| 7-Hydroxyflavone | Ca13        | CHEMBL2186    | Q9D6N1     | 0.053556076  | 27 / 1                |
| 7-Hydroxyflavone | Akr1c21     | CHEMBL1075270 | Q91WR5     | 0.053556076  | 2 / 1                 |
| 7-Hydroxyflavone | Alk         | CHEMBL5771    | P97793     | 0.053556076  | 42 / 3                |
| 7-Hydroxyflavone | Fyn         | CHEMBL4517    | P39688     | 0.053556076  | 8 / 1                 |
| 7-Hydroxyflavone | Akt1        | CHEMBL5859    | P31750     | 0.053556076  | 12 / 4                |
| 7-Hydroxyflavone | Csnk2a1     | CHEMBL3537    | Q60737     | 0.053556076  | 15 / 2                |
| 7-Hydroxyflavone | Insr        | CHEMBL3187    | P15208     | 0.053556076  | 8 / 1                 |
| 7-Hydroxyflavone | Mapk3       | CHEMBL5510    | Q63844     | 0.053556076  | 1 / 1                 |
| 7-Hydroxyflavone | Pygl        | CHEMBL3008    | Q9ET01     | 0.053556076  | 11 / 1                |

|                  |         |               |        |             |         |
|------------------|---------|---------------|--------|-------------|---------|
| 7-Hydroxyflavone | Ptgs2   | CHEMBL4321    | Q05769 | 0.053556076 | 95 / 44 |
| 7-Hydroxyflavone | Esr1    | CHEMBL3065    | P19785 | 0.053556076 | 14 / 34 |
| 7-Hydroxyflavone | Pparg   | CHEMBL2459    | P37238 | 0.053556076 | 0 / 3   |
| 7-Hydroxyflavone | Top1    | CHEMBL2814    | Q04750 | 0.053556076 | 0 / 1   |
| 7-Hydroxyflavone | Tacr2   | CHEMBL2813    | P30549 | 0.053556076 | 2 / 1   |
| 7-Hydroxyflavone | Parp1   | CHEMBL3740    | P11103 | 0.053556076 | 9 / 0   |
| 7-Hydroxyflavone | Ctsl    | CHEMBL5291    | P06797 | 0.053556076 | 5 / 0   |
| 7-Hydroxyflavone | Drd2    | CHEMBL3427    | P61168 | 0.053556076 | 18 / 59 |
| 7-Hydroxyflavone | Mcl1    | CHEMBL5768    | P97287 | 0.053556076 | 2 / 1   |
| 7-Hydroxyflavone | Cd38    | CHEMBL3425388 | P56528 | 0.053556076 | 23 / 2  |
| 7-Hydroxyflavone | Tyms    | CHEMBL3160    | P07607 | 0.053556076 | 80 / 0  |
| 7-Hydroxyflavone | Plg     | CHEMBL1075299 | P20918 | 0.053556076 | 0 / 3   |
| 7-Hydroxyflavone | Grm5    | CHEMBL1641352 | Q3UVX5 | 0.053556076 | 263 / 0 |
| 7-Hydroxyflavone | Parp2   | CHEMBL2794    | O88554 | 0.053556076 | 6 / 1   |
| 7-Hydroxyflavone | Jak3    | CHEMBL5250    | Q62137 | 0.053556076 | 219 / 0 |
| 7-Hydroxyflavone | Gsk3a   | CHEMBL2176843 | Q2NL51 | 0.053556076 | 27 / 0  |
| 7-Hydroxyflavone | Prkcd   | CHEMBL2560    | P28867 | 0.053556076 | 3 / 0   |
| 7-Hydroxyflavone | Prkch   | CHEMBL4992    | P23298 | 0.053556076 | 1 / 0   |
| 7-Hydroxyflavone | Alpl    | CHEMBL2660    | P09242 | 0.053556076 | 40 / 0  |
| 7-Hydroxyflavone | Aurka   | CHEMBL2211    | P97477 | 0.053556076 | 36 / 0  |
| 7-Hydroxyflavone | Impdh2  | CHEMBL3169    | P24547 | 0.053556076 | 3 / 0   |
| 7-Hydroxyflavone | Htr1a   | CHEMBL3737    | Q64264 | 0.053556076 | 20 / 0  |
| 7-Hydroxyflavone | Slc6a3  | CHEMBL2799    | Q61327 | 0.053556076 | 9 / 0   |
| 7-Hydroxyflavone | Nos2    | CHEMBL3464    | P29477 | 0.053556076 | 79 / 3  |
| 7-Hydroxyflavone | Tlr7    | CHEMBL6085    | P58681 | 0.053556076 | 7 / 0   |
| 7-Hydroxyflavone | Mdm2    | CHEMBL3600279 | P23804 | 0.053556076 | 9 / 0   |
| 7-Hydroxyflavone | Mapk9   | CHEMBL2034797 | Q9WTU6 | 0           | 73 / 0  |
| 7-Hydroxyflavone | Ret     | CHEMBL2034799 | P35546 | 0           | 46 / 0  |
| 7-Hydroxyflavone | Cnr1    | CHEMBL3037    | P47746 | 0           | 117 / 0 |
| 7-Hydroxyflavone | Cnr2    | CHEMBL5373    | P47936 | 0           | 77 / 0  |
| 7-Hydroxyflavone | Dyrk1a  | CHEMBL4750    | Q61214 | 0           | 67 / 0  |
| 7-Hydroxyflavone | Dhodh   | CHEMBL2991    | O35435 | 0           | 7 / 0   |
| 7-Hydroxyflavone | Sigmar1 | CHEMBL3465    | O55242 | 0           | 2 / 64  |
| 7-Hydroxyflavone | Hsd11b1 | CHEMBL3910    | P50172 | 0           | 48 / 0  |
| 7-Hydroxyflavone | Pik3ca  | CHEMBL2499    | P42337 | 0           | 122 / 0 |
| 7-Hydroxyflavone | Mtor    | CHEMBL1255165 | Q9JLN9 | 0           | 67 / 0  |
| 7-Hydroxyflavone | Ctsk    | CHEMBL1075277 | P55097 | 0           | 42 / 0  |
| 7-Hydroxyflavone | Pde10a  | CHEMBL1795126 | Q8CA95 | 0           | 208 / 0 |
| 7-Hydroxyflavone | Ptpn1   | CHEMBL3336    | P35821 | 0           | 7 / 14  |
| 7-Hydroxyflavone | Kcna3   | CHEMBL4818    | P16390 | 0           | 1 / 3   |
| 7-Hydroxyflavone | Tgfb1   | CHEMBL2021750 | Q64729 | 0           | 40 / 0  |
| 7-Hydroxyflavone | Adora2b | CHEMBL2237    | Q60614 | 0           | 63 / 0  |
| 7-Hydroxyflavone | Pdgfrb  | CHEMBL2749    | P05622 | 0           | 5 / 0   |
| 7-Hydroxyflavone | Kdr     | CHEMBL3337    | P35918 | 0           | 6 / 0   |

|                                         |         |               |        |             |        |
|-----------------------------------------|---------|---------------|--------|-------------|--------|
| 7-Hydroxyflavone                        | Flt1    | CHEMBL3516    | P35969 | 0           | 53 / 0 |
| 7-Hydroxyflavone                        | Braf    | CHEMBL2331061 | P28028 | 0           | 54 / 0 |
| 7-Hydroxyflavone                        | Tspo    | CHEMBL2149    | P50637 | 0           | 98 / 0 |
| 7-Hydroxyflavone                        | Abhd6   | CHEMBL5010    | Q8R2Y0 | 0           | 2 / 0  |
| 7-Hydroxyflavone                        | Mc4r    | CHEMBL3719    | P56450 | 0           | 3 / 0  |
| 7-Hydroxyflavone                        | Ctsb    | CHEMBL5187    | P10605 | 0           | 12 / 0 |
| 7-Hydroxyflavone                        | Fasn    | CHEMBL1795189 | P19096 | 0           | 3 / 0  |
| 7-Hydroxyflavone                        | Chrm1   | CHEMBL3733    | P12657 | 0           | 20 / 0 |
| 7-Hydroxyflavone                        | Stat3   | CHEMBL5402    | P42227 | 0           | 18 / 0 |
| 7-Hydroxyflavone                        | Taar1   | CHEMBL4908    | Q923Y8 | 0           | 38 / 0 |
| 7-Hydroxyflavone                        | Raf1    | CHEMBL3804748 | Q99N57 | 0           | 9 / 0  |
| 7-Hydroxyflavone                        | Ccr1    | CHEMBL3872    | P51675 | 0           | 6 / 0  |
| 7-Hydroxyflavone                        | Ccr2    | CHEMBL5412    | P51683 | 0           | 6 / 0  |
| 7-Hydroxyflavone                        | Ido1    | CHEMBL1075294 | P28776 | 0           | 22 / 0 |
| 7-Hydroxyflavone                        | Ephx2   | CHEMBL4140    | P34914 | 0           | 11 / 0 |
| 7-Hydroxyflavone                        | Bace2   | CHEMBL3638357 | Q9JL18 | 0           | 68 / 0 |
| Malvidin-3-O-galactoside<br>(Primulin)* | Oprd1   | CHEMBL3222    | P32300 | 0.104671941 | 0 / 5  |
| Malvidin-3-O-galactoside<br>(Primulin)* | Ptgs1   | CHEMBL2649    | P22437 | 0.104671941 | 0 / 3  |
| Malvidin-3-O-galactoside<br>(Primulin)* | Pde4b   | CHEMBL2272    | Q8VBU5 | 0.104671941 | 0 / 1  |
| Malvidin-3-O-galactoside<br>(Primulin)* | Oprm1   | CHEMBL2858    | P42866 | 0.104671941 | 0 / 1  |
| Malvidin-3-O-galactoside<br>(Primulin)* | Kit     | CHEMBL2034798 | P05532 | 0.104671941 | 0 / 2  |
| Malvidin-3-O-galactoside<br>(Primulin)* | Hdac6   | CHEMBL2878    | Q9Z2V5 | 0           | 0 / 1  |
| Malvidin-3-O-galactoside<br>(Primulin)* | Hdac8   | CHEMBL2347    | Q8VH37 | 0           | 0 / 1  |
| Malvidin-3-O-galactoside<br>(Primulin)* | Hdac1   | CHEMBL4001    | O09106 | 0           | 0 / 1  |
| Malvidin-3-O-galactoside<br>(Primulin)* | Map2k1  | CHEMBL5860    | P31938 | 0           | 0 / 1  |
| Malvidin-3-O-galactoside<br>(Primulin)* | Mapk1   | CHEMBL2207    | P63085 | 0           | 0 / 1  |
| Malvidin-3-O-galactoside<br>(Primulin)* | Hif1a   | CHEMBL6046    | Q61221 | 0           | 0 / 15 |
| Malvidin-3-O-galactoside<br>(Primulin)* | Adrb1   | CHEMBL3440    | P34971 | 0           | 1 / 0  |
| Malvidin-3-O-galactoside<br>(Primulin)* | Htr2c   | CHEMBL3006    | P34968 | 0           | 0 / 1  |
| Malvidin-3-O-galactoside<br>(Primulin)* | Rps6ka3 | CHEMBL3297641 | P18654 | 0           | 0 / 10 |

|                                         |          |               |        |             |        |
|-----------------------------------------|----------|---------------|--------|-------------|--------|
| Malvidin-3-O-galactoside<br>(Primulin)* | Plau     | CHEMBL1075311 | P06869 | 0           | 0 / 2  |
| Malvidin-3-O-galactoside<br>(Primulin)* | S1pr1    | CHEMBL1914262 | O08530 | 0           | 0 / 2  |
| Malvidin-3-O-galactoside<br>(Primulin)* | Abl1     | CHEMBL3099    | P00520 | 0           | 0 / 7  |
| Malvidin-3-O-galactoside<br>(Primulin)* | Ppara    | CHEMBL2128    | P23204 | 0           | 0 / 1  |
| Malvidin-3-O-galactoside<br>(Primulin)* | Il5      | CHEMBL1163111 | P04401 | 0           | 0 / 1  |
| Ferulic acid                            | Ca15     | CHEMBL5973    | Q99N23 | 0.041470299 | 5 / 3  |
| Ferulic acid                            | Tlr4     | CHEMBL1795167 | Q9QUK6 | 0.041470299 | 0 / 13 |
| Ferulic acid                            | Fbp1     | CHEMBL5360    | Q9QXD6 | 0.031226558 | 22 / 0 |
| Ferulic acid                            | Ace      | CHEMBL2994    | P09470 | 0.031226558 | 16 / 0 |
| Ferulic acid                            | Ren1     | CHEMBL2615    | P06281 | 0.031226558 | 1 / 0  |
| Ferulic acid                            | Slc13a5  | CHEMBL3769294 | Q67BT3 | 0.031226558 | 10 / 0 |
| Ferulic acid                            | Kmo      | CHEMBL3407318 | Q91WN4 | 0           | 18 / 0 |
| Ferulic acid                            | Ptgdr2   | CHEMBL2291    | Q9Z2J6 | 0           | 5 / 0  |
| Ferulic acid                            | Mme      | CHEMBL2642    | Q61391 | 0           | 24 / 0 |
| Ferulic acid                            | Slc6a2   | CHEMBL2370    | O55192 | 0           | 0 / 2  |
| Ferulic acid                            | Mif      | CHEMBL1926491 | P34884 | 0           | 1 / 1  |
| Ferulic acid                            | Dao      | CHEMBL2331068 | P18894 | 0           | 8 / 0  |
| Ferulic acid                            | Ada      | CHEMBL3206    | P03958 | 0           | 6 / 0  |
| Ferulic acid                            | Ednra    | CHEMBL2286    | Q61614 | 0           | 0 / 22 |
| Ferulic acid                            | Prkcq    | CHEMBL1075295 | Q02111 | 0           | 0 / 4  |
| Ferulic acid                            | Hsd17b3  | CHEMBL1932905 | P70385 | 0           | 0 / 1  |
| Ferulic acid                            | Cda      | CHEMBL2110    | P56389 | 0           | 18 / 0 |
| Ferulic acid                            | Hcar2    | CHEMBL4420    | Q9EP66 | 0           | 14 / 1 |
| Ferulic acid                            | Gaa      | CHEMBL1667668 | P70699 | 0           | 3 / 0  |
| Ferulic acid                            | Slc22a6  | CHEMBL5653    | Q8VC69 | 0           | 2 / 0  |
| Ferulic acid                            | Ugcg     | CHEMBL6013    | O88693 | 0           | 1 / 0  |
| Ferulic acid                            | P2rx1    | CHEMBL5496    | P51576 | 0           | 1 / 0  |
| Ferulic acid                            | Ptger4   | CHEMBL2489    | P32240 | 0           | 0 / 10 |
| Ferulic acid                            | Gba2     | CHEMBL5614    | Q69ZF3 | 0           | 8 / 0  |
| Ferulic acid                            | Sell     | CHEMBL3162    | P18337 | 0           | 1 / 0  |
| Ferulic acid                            | Selp     | CHEMBL2455    | Q01102 | 0           | 1 / 0  |
| Ferulic acid                            | Sis      | CHEMBL1667666 | B5THE3 | 0           | 3 / 0  |
| Ferulic acid                            | Anpep    | CHEMBL2189140 | P97449 | 0           | 4 / 0  |
| Ferulic acid                            | Cdc25b   | CHEMBL2723    | P30306 | 0           | 3 / 0  |
| Ferulic acid                            | Cacna2d1 | CHEMBL4676    | O08532 | 0           | 9 / 0  |
| Ferulic acid                            | Gria1    | CHEMBL3502    | P23818 | 0           | 3 / 0  |
| Ferulic acid                            | Atic     | CHEMBL2277    | Q9CWJ9 | 0           | 1 / 0  |
| Ferulic acid                            | Dpp4     | CHEMBL3883    | P28843 | 0           | 2 / 0  |
| Ferulic acid                            | Gba      | CHEMBL2278    | P17439 | 0           | 8 / 0  |

|                                                     |          |               |        |             |       |
|-----------------------------------------------------|----------|---------------|--------|-------------|-------|
| Ferulic acid                                        | Htr7     | CHEMBL4764    | P32304 | 0           | 1 / 0 |
| Ferulic acid                                        | Clk1     | CHEMBL1075280 | P22518 | 0           | 0 / 3 |
| Ferulic acid                                        | Ahcy     | CHEMBL2389    | P50247 | 0           | 1 / 0 |
| Ferulic acid                                        | Hmgcr    | CHEMBL2764    | Q01237 | 0           | 2 / 1 |
| Ferulic acid                                        | Mapkapk2 | CHEMBL4990    | P49138 | 0           | 1 / 0 |
| Ferulic acid                                        | Casp1    | CHEMBL4800    | P29452 | 0           | 2 / 0 |
| Ferulic acid                                        | Hes1     | CHEMBL1075292 | P35428 | 0           | 1 / 0 |
| Ferulic acid                                        | Upp1     | CHEMBL3718    | P52624 | 0           | 2 / 0 |
| Ferulic acid                                        | Cyp27b1  | CHEMBL3329080 | O35084 | 0           | 0 / 1 |
| Ferulic acid                                        | Ptgdr    | CHEMBL3933    | P70263 | 0           | 0 / 1 |
| Ferulic acid                                        | Ptger3   | CHEMBL4336    | P30557 | 0           | 0 / 3 |
| Ferulic acid                                        | Chrna7   | CHEMBL3365    | P49582 | 0           | 0 / 7 |
| 3,4-Dihydroxybenzoic acid<br>(Protocatechuic acid)* | Comt     | CHEMBL3286068 | O88587 | 0.043918633 | 0 / 7 |
| 3,4-Dihydroxybenzoic acid<br>(Protocatechuic acid)* | Polb     | CHEMBL4565    | Q8K409 | 0           | 0 / 2 |
| 3,4-Dihydroxybenzoic acid<br>(Protocatechuic acid)* | Adrb2    | CHEMBL3707    | P18762 | 0           | 0 / 4 |
| 3,4-Dihydroxybenzoic acid<br>(Protocatechuic acid)* | Rarg     | CHEMBL4177    | P18911 | 0           | 0 / 3 |
| 3,4-Dihydroxybenzoic acid<br>(Protocatechuic acid)* | Rarb     | CHEMBL3266    | P22605 | 0           | 0 / 3 |
| 3,4-Dihydroxybenzoic acid<br>(Protocatechuic acid)* | Rxrg     | CHEMBL4402    | P28705 | 0           | 0 / 1 |
| 3,4-Dihydroxybenzoic acid<br>(Protocatechuic acid)* | Rxra     | CHEMBL3084    | P28700 | 0           | 0 / 1 |
| 3,4-Dihydroxybenzoic acid<br>(Protocatechuic acid)* | Rara     | CHEMBL2792    | P11416 | 0           | 0 / 2 |
| 3,4-Dihydroxybenzoic acid<br>(Protocatechuic acid)* | Adrb3    | CHEMBL4030    | P25962 | 0           | 0 / 2 |
| 3,4-Dihydroxybenzoic acid<br>(Protocatechuic acid)* | Hsp90aa1 | CHEMBL4197    | P07901 | 0           | 0 / 2 |
| 3,4-Dihydroxybenzoic acid<br>(Protocatechuic acid)* | Trpm8    | CHEMBL3108632 | Q8R4D5 | 0           | 0 / 1 |
| 3,4-Dihydroxybenzoic acid<br>(Protocatechuic acid)* | Ces2c    | CHEMBL2217    | Q91WG0 | 0           | 0 / 1 |
| p-Coumaric acid ethyl ester                         | Trpa1    | CHEMBL1075310 | Q8BLA8 | 0           | 0 / 1 |
| p-Coumaric acid ethyl ester                         | Ptger2   | CHEMBL2488    | Q62053 | 0           | 0 / 7 |
| p-Coumaric acid ethyl ester                         | Drd1     | CHEMBL3071    | Q61616 | 0           | 0 / 1 |
| p-Coumaric acid ethyl ester                         | Slc6a4   | CHEMBL4642    | Q60857 | 0           | 0 / 1 |
| p-Coumaric acid ethyl ester                         | Oprk1    | CHEMBL4329    | P33534 | 0           | 0 / 1 |
| p-Coumaric acid ethyl ester                         | Mgll     | CHEMBL5774    | O35678 | 0           | 0 / 1 |
| p-Coumaric acid ethyl ester                         | Ppard    | CHEMBL2458    | P35396 | 0           | 0 / 2 |
| IsoFerulic acid                                     | Metap2   | CHEMBL1075272 | O08663 | 0           | 1 / 0 |

|                                               |         |               |        |             |         |
|-----------------------------------------------|---------|---------------|--------|-------------|---------|
| IsoFerulic acid                               | Csnk2a2 | CHEMBL5326    | O54833 | 0           | 2 / 0   |
| IsoFerulic acid                               | Aoc3    | CHEMBL4727    | O70423 | 0           | 1 / 0   |
| IsoFerulic acid                               | Notum   | CHEMBL3758064 | Q8R116 | 0           | 2 / 0   |
| IsoFerulic acid                               | Slc5a2  | CHEMBL1075302 | Q923I7 | 0           | 2 / 0   |
| IsoFerulic acid                               | Ffar1   | CHEMBL5411    | Q76JU9 | 0           | 1 / 0   |
| Syringic acid                                 | St14    | CHEMBL3745587 | P56677 | 0           | 0 / 2   |
| Syringic acid                                 | Lta4h   | CHEMBL3738    | P24527 | 0           | 2 / 0   |
| Syringic acid                                 | Adam17  | CHEMBL4379    | Q9Z0F8 | 0           | 4 / 0   |
| Syringic acid                                 | Dhfr    | CHEMBL4564    | P00375 | 0           | 0 / 4   |
| Syringic acid                                 | Ptafr   | CHEMBL3993    | Q62035 | 0           | 0 / 2   |
| Syringic acid                                 | Ces1d   | CHEMBL3137293 | Q8VCT4 | 0           | 0 / 1   |
| Syringic acid                                 | Rxrb    | CHEMBL4047    | P28704 | 0           | 0 / 1   |
| Syringic acid                                 | Gcgr    | CHEMBL4773    | Q61606 | 0           | 0 / 3   |
| Syringic acid                                 | Sphk2   | CHEMBL1075305 | Q9JIA7 | 0           | 0 / 2   |
| Syringic acid                                 | Sphk1   | CHEMBL2401605 | Q8CI15 | 0           | 0 / 2   |
| Chlorogenic acid<br>(3-O-Caffeoylquinic acid) | Prkca   | CHEMBL2567    | P20444 | 0.097239989 | 0 / 198 |
| Chlorogenic acid<br>(3-O-Caffeoylquinic acid) | Fpgs    | CHEMBL2890    | P48760 | 0           | 2 / 0   |
| Chlorogenic acid<br>(3-O-Caffeoylquinic acid) | Dnmt1   | CHEMBL3351195 | P13864 | 0           | 4 / 0   |
| Chlorogenic acid<br>(3-O-Caffeoylquinic acid) | Carm1   | CHEMBL5538    | Q9WVG6 | 0           | 1 / 0   |
| Chlorogenic acid<br>(3-O-Caffeoylquinic acid) | Ehmt2   | CHEMBL2169718 | Q9Z148 | 0           | 1 / 0   |
| Chlorogenic acid<br>(3-O-Caffeoylquinic acid) | Mag     | CHEMBL1250416 | P20917 | 0           | 4 / 0   |
| Chlorogenic acid<br>(3-O-Caffeoylquinic acid) | Slc5a1  | CHEMBL1744523 | Q9QXI6 | 0           | 1 / 0   |
| Chlorogenic acid<br>(3-O-Caffeoylquinic acid) | Bcl2a1  | CHEMBL1293239 | Q07440 | 0           | 1 / 0   |
| Chlorogenic acid<br>(3-O-Caffeoylquinic acid) | Gart    | CHEMBL3690    | Q64737 | 0           | 1 / 0   |
| Chlorogenic acid<br>(3-O-Caffeoylquinic acid) | Btk     | CHEMBL3259478 | P35991 | 0           | 1 / 0   |
| Chlorogenic acid<br>(3-O-Caffeoylquinic acid) | Cd22    | CHEMBL1075279 | P35329 | 0           | 1 / 0   |
| Chlorogenic acid<br>(3-O-Caffeoylquinic acid) | Chrm2   | CHEMBL3197    | Q9ERZ4 | 0           | 0 / 11  |
| Sinapic acid                                  | Ptger1  | CHEMBL2181    | P35375 | 0           | 1 / 0   |
| Sinapic acid                                  | Hrh3    | CHEMBL3263    | P58406 | 0           | 1 / 0   |
| Vanillic acid                                 | Ddo     | CHEMBL3616357 | Q922Z0 | 0           | 1 / 0   |
| Vanillic acid                                 | Htr4    | CHEMBL2183    | P97288 | 0           | 0 / 3   |
| Isovanillin                                   | Dusp1   | CHEMBL5623    | P28563 | 0           | 1 / 0   |

|                           |         |               |        |             |         |
|---------------------------|---------|---------------|--------|-------------|---------|
| Isovanillin               | Nlrp3   | CHEMBL3779755 | Q8R4B8 | 0           | 1 / 0   |
| Isovanillin               | Tgm2    | CHEMBL2079853 | P21981 | 0           | 2 / 0   |
| Isovanillin               | Ephx1   | CHEMBL1075293 | Q9D379 | 0           | 10 / 0  |
| Isovanillin               | Nos3    | CHEMBL2643    | P70313 | 0           | 3 / 0   |
| Isovanillin               | Soat1   | CHEMBL4464    | Q61263 | 0           | 1 / 0   |
| Isovanillin               | Mapk14  | CHEMBL2336    | P47811 | 0           | 0 / 3   |
| Isovanillin               | Pla2g10 | CHEMBL4200    | Q9QXX3 | 0           | 3 / 0   |
| Isovanillin               | Faah    | CHEMBL3455    | O08914 | 0           | 1 / 0   |
| Isovanillin               | Nat2    | CHEMBL5724    | P50295 | 0           | 1 / 0   |
| Isovanillin               | Nampt   | CHEMBL3259474 | Q99KQ4 | 0           | 1 / 0   |
| Isovanillin               | Htr5a   | CHEMBL3597    | P30966 | 0           | 4 / 0   |
| Isovanillin               | Kcnj2   | CHEMBL1293290 | P35561 | 0           | 0 / 1   |
| Diisobutyl phthalate      | Ctsg    | CHEMBL5622    | P28293 | 0.100578902 | 24 / 0  |
| Diisobutyl phthalate      | Prep    | CHEMBL4935    | Q9QUR6 | 0.100578902 | 128 / 0 |
| Diisobutyl phthalate      | Hcrt2   | CHEMBL2434818 | P58308 | 0.100578902 | 707 / 0 |
| Diisobutyl phthalate      | Hcrt1   | CHEMBL2434819 | P58307 | 0.100578902 | 572 / 0 |
| Diisobutyl phthalate      | Rps6ka2 | CHEMBL3351220 | Q9WUT3 | 0.100578902 | 6 / 0   |
| Diisobutyl phthalate      | Mapk11  | CHEMBL4335    | Q9WU11 | 0.100578902 | 41 / 0  |
| Diisobutyl phthalate      | Clk3    | CHEMBL1075282 | O35492 | 0.100578902 | 2 / 0   |
| Diisobutyl phthalate      | P2rx7   | CHEMBL5183    | Q9Z1M0 | 0.100578902 | 365 / 0 |
| Diisobutyl phthalate      | Gpbar1  | CHEMBL1255150 | Q80SS6 | 0.100578902 | 52 / 0  |
| Diisobutyl phthalate      | Hrh4    | CHEMBL5657    | Q91ZY2 | 0.100578902 | 38 / 0  |
| Diisobutyl phthalate      | Lyn     | CHEMBL2258    | P25911 | 0.100578902 | 3 / 0   |
| Diisobutyl phthalate      | Fgfr4   | CHEMBL3839    | Q03142 | 0.100578902 | 3 / 0   |
| Diisobutyl phthalate      | Fgr     | CHEMBL2034795 | P14234 | 0.100578902 | 4 / 0   |
| Diisobutyl phthalate      | Tie1    | CHEMBL2034800 | Q06806 | 0.100578902 | 2 / 0   |
| Diisobutyl phthalate      | Ros1    | CHEMBL2034802 | Q78DX7 | 0.100578902 | 4 / 0   |
| Diisobutyl phthalate      | Trpv4   | CHEMBL6126    | Q9EPK8 | 0.100578902 | 4 / 0   |
| Diisobutyl phthalate      | Pde7a   | CHEMBL2040702 | P70453 | 0.100578902 | 58 / 0  |
| Diisobutyl phthalate      | Grm1    | CHEMBL2892    | P97772 | 0.100578902 | 47 / 0  |
| Diisobutyl phthalate      | Gck     | CHEMBL3112387 | P52792 | 0.100578902 | 78 / 0  |
| Diisobutyl phthalate      | Rorc    | CHEMBL1293231 | P51450 | 0.100578902 | 52 / 0  |
| Diisobutyl phthalate      | Gpr39   | CHEMBL3341584 | Q5U431 | 0.100578902 | 11 / 0  |
| Diisobutyl phthalate      | Shh     | CHEMBL5387    | Q62226 | 0           | 10 / 0  |
| Diisobutyl phthalate      | Tdo2    | CHEMBL1075307 | P48776 | 0           | 11 / 0  |
| Diisobutyl phthalate      | Scn10a  | CHEMBL5158    | Q6QIY3 | 0           | 14 / 0  |
| Diisobutyl phthalate      | Bdkrb1  | CHEMBL1250407 | Q61125 | 0           | 12 / 0  |
| Diisobutyl phthalate      | Npy5r   | CHEMBL3802    | O70342 | 0           | 168 / 0 |
| Diisobutyl phthalate      | Rapgef4 | CHEMBL3593151 | Q9EQZ6 | 0           | 15 / 0  |
| Diisobutyl phthalate      | Ppme1   | CHEMBL2189138 | Q8BVQ5 | 0           | 7 / 0   |
| $\alpha$ -Linolenic Acid* | Scd1    | CHEMBL5353    | P13516 | 0.141522086 | 14 / 1  |
| $\alpha$ -Linolenic Acid* | Ffar4   | CHEMBL2052036 | Q7TMA4 | 0.100578902 | 21 / 0  |
| $\alpha$ -Linolenic Acid* | Npc111  | CHEMBL1075296 | Q6T3U4 | 0.100578902 | 0 / 10  |
| $\alpha$ -Linolenic Acid* | Nr3c1   | CHEMBL3144    | P06537 | 0.100578902 | 0 / 2   |



|                                       |          |               |        |             |         |
|---------------------------------------|----------|---------------|--------|-------------|---------|
| $\alpha$ -Linolenic Acid*             | Hsd11b2  | CHEMBL3490    | P51661 | 0.100578902 | 17 / 19 |
| Linoleic acid                         | Enpp2    | CHEMBL3826871 | Q9R1E6 | 0.100578902 | 31 / 0  |
| Linoleic acid                         | Alox5ap  | CHEMBL3414408 | P30355 | 0.100578902 | 96 / 0  |
| Linoleic acid                         | Nr1i3    | CHEMBL3069    | O35627 | 0           | 0 / 2   |
| Linoleic acid                         | Mc1r     | CHEMBL4077    | Q01727 | 0           | 1 / 0   |
| linoleic acid                         | Smo      | CHEMBL6080    | P56726 | 0           | 1 / 0   |
| linoleic acid                         | Dgat1    | CHEMBL1075284 | Q9Z2A7 | 0           | 107 / 0 |
| linoleic acid                         | Avpr1a   | CHEMBL3414410 | Q62463 | 0           | 12 / 0  |
| linoleic acid                         | Cckbr    | CHEMBL2854    | P56481 | 0           | 52 / 0  |
| linoleic acid                         | Gpam     | CHEMBL3580525 | Q61586 | 0           | 1 / 0   |
| linoleic acid                         | Dagla    | CHEMBL5180    | Q6WQJ1 | 0           | 5 / 0   |
| linoleic acid                         | Acacb    | CHEMBL3108631 | E9Q4Z2 | 0           | 1 / 0   |
| linoleic acid                         | Slc10a2  | CHEMBL2073708 | P70172 | 0           | 10 / 0  |
| linoleic acid                         | Slc22a1  | CHEMBL2073664 | O08966 | 0           | 1 / 0   |
| 1-Linoleoylglycerol                   | Vdr      | CHEMBL5601    | P48281 | 0.097239989 | 8 / 0   |
| 1-Linoleoylglycerol                   | Scn9a    | CHEMBL3414411 | Q62205 | 0.097239989 | 8 / 0   |
| 1-Linoleoylglycerol                   | Gpr119   | CHEMBL5263    | Q7TQP3 | 0.097239989 | 1 / 0   |
| 1-Linoleoylglycerol                   | Tacr1    | CHEMBL2668    | P30548 | 0           | 4 / 0   |
| 1-Linoleoylglycerol                   | Csf1r    | CHEMBL5570    | P09581 | 0           | 18 / 0  |
| 1-Linoleoylglycerol                   | Lpar4    | CHEMBL3321650 | Q8BLG2 | 0           | 2 / 6   |
| 1-Linoleoylglycerol                   | Lpar1    | CHEMBL3621025 | P61793 | 0           | 2 / 18  |
| 1-Linoleoylglycerol                   | Tbk1     | CHEMBL2189160 | Q9WUN2 | 0           | 11 / 0  |
| 1-Linoleoylglycerol                   | Cer5     | CHEMBL3676    | P51682 | 0           | 7 / 0   |
| 1-Linoleoylglycerol                   | Inhba    | CHEMBL3588734 | Q04998 | 0           | 1 / 0   |
| 1-Linoleoylglycerol                   | Cxcr3    | CHEMBL5200    | O88410 | 0           | 5 / 0   |
| 1-Linoleoylglycerol                   | Zap70    | CHEMBL2034801 | P43404 | 0           | 1 / 0   |
| Hydroperoxylinoleic acid              | Lipg     | CHEMBL2380190 | Q9WVG5 | 0           | 3 / 0   |
| Hydroperoxylinoleic acid              | Mogat2   | CHEMBL3603729 | Q80W94 | 0           | 1 / 0   |
| Hydroperoxylinoleic acid              | Tbxa2r   | CHEMBL1795181 | P30987 | 0           | 0 / 1   |
| Methyl linolenate                     | Clk2     | CHEMBL1075281 | O35491 | 0.111501865 | 26 / 0  |
| Methyl linolenate                     | Clk4     | CHEMBL1075283 | O35493 | 0.111501865 | 59 / 0  |
| Methyl linolenate                     | Scarb1   | CHEMBL1741203 | Q61009 | 0.111501865 | 36 / 0  |
| Methyl linolenate                     | Gckr     | CHEMBL3232700 | Q91X44 | 0.111501865 | 11 / 0  |
| Methyl linolenate                     | Porcn    | CHEMBL1255164 | Q9JJJ7 | 0.111501865 | 34 / 0  |
| Methyl linolenate                     | Fpr-s1   | CHEMBL3407315 | O08790 | 0.111501865 | 26 / 0  |
| Methyl linolenate                     | Calcr1   | CHEMBL2034811 | Q9R1W5 | 0.111501865 | 123 / 0 |
| Methyl linolenate                     | Dck      | CHEMBL2570    | P43346 | 0           | 38 / 0  |
| Methyl linolenate                     | Gnrhr    | CHEMBL3232679 | Q01776 | 0           | 26 / 0  |
| Elaidic Acid*                         | Slc22a20 | CHEMBL5269    | Q80UJ1 | 0           | 0 / 5   |
| Elaidic Acid*                         | Hrh1     | CHEMBL4322    | P70174 | 0           | 5 / 0   |
| Elaidic Acid*                         | Ntsr1    | CHEMBL3570    | O88319 | 0           | 11 / 0  |
| (7Z)-Hexadecenoic acid                | Cckar    | CHEMBL2798    | O08786 | 0           | 17 / 0  |
| Apigenin;<br>4',5,7-Trihydroxyflavone | Stk3     | CHEMBL4310    | Q9JI10 | 0           | 0 / 1   |

|                                       |         |               |        |             |       |
|---------------------------------------|---------|---------------|--------|-------------|-------|
| Apigenin;<br>4',5,7-Trihydroxyflavone | Acvr1   | CHEMBL3309042 | P37172 | 0           | 0 / 1 |
| Apigenin;<br>4',5,7-Trihydroxyflavone | Gpr35   | CHEMBL2390813 | Q9ES90 | 0           | 0 / 1 |
| Palmitic acid                         | Ptgfr   | CHEMBL5000    | P43117 | 0.053556076 | 1 / 1 |
| Palmitic acid                         | Crabp1  | CHEMBL3208    | P62965 | 0.053556076 | 5 / 0 |
| Palmitic acid                         | Crabp2  | CHEMBL4172    | P22935 | 0.053556076 | 6 / 0 |
| Palmitic acid                         | Rnpep   | CHEMBL2836    | Q8VCT3 | 0           | 0 / 2 |
| Hydroxyicosanoic Acid                 | Pla2g2a | CHEMBL5761    | P31482 | 0           | 2 / 0 |
| Hydroxyicosanoic Acid                 | Pla2g5  | CHEMBL4167    | P97391 | 0           | 1 / 0 |
| Hydroxyicosanoic Acid                 | Pla2g2d | CHEMBL5537    | Q9WVF6 | 0           | 1 / 0 |
| Hydroxyicosanoic Acid                 | Acaca   | CHEMBL3086    | Q5SWU9 | 0           | 1 / 0 |
| Hydroxyicosanoic Acid                 | Grn8    | CHEMBL4626    | P47743 | 0           | 0 / 1 |
| Hydroxyicosanoic Acid                 | Slc6a11 | CHEMBL3699    | P31650 | 0           | 0 / 1 |
| Hydroxyicosanoic Acid                 | Slc6a1  | CHEMBL5445    | P31648 | 0           | 0 / 1 |
| Hydroxyicosanoic Acid                 | Paox    | CHEMBL3408    | Q8C0L6 | 0           | 0 / 1 |
| Hydroxyicosanoic Acid                 | Slc6a13 | CHEMBL5205    | P31649 | 0           | 0 / 1 |
| Docosanoic acid (Behenic<br>acid)     | Ccr3    | CHEMBL3406    | P51678 | 0           | 1 / 0 |

**Table S3. Summary of ALD-Gene Associations.** In DisGeNET database, 195 ALD-related genes were obtained.

| Disease                  | UniProt | Gene     | DSI_g | DPI_g | Score_gda | First_Ref | Last_Ref |
|--------------------------|---------|----------|-------|-------|-----------|-----------|----------|
| Alcoholic Liver Diseases | Q9NST1  | PNPLA3   | 0.556 | 0.692 | 0.4       | 2010      | 2019     |
| Alcoholic Liver Diseases | P10451  | SPP1     | 0.353 | 0.885 | 0.33      | 2008      | 2014     |
| Alcoholic Liver Diseases | P05181  | CYP2E1   | 0.459 | 0.885 | 0.3       | 1997      | 2018     |
| Alcoholic Liver Diseases | P02753  | RBP4     | 0.493 | 0.808 | 0.3       | 2006      | 2006     |
| Alcoholic Liver Diseases | Q03181  | PPARD    | 0.513 | 0.846 | 0.3       | 2016      | 2016     |
| Alcoholic Liver Diseases | P01375  | TNF      | 0.231 | 0.962 | 0.3       | 1995      | 2016     |
| Alcoholic Liver Diseases | Q30201  | HFE      | 0.436 | 0.846 | 0.26      | 1998      | 2012     |
| Alcoholic Liver Diseases | P01584  | IL1B     | 0.276 | 0.962 | 0.23      | 2000      | 2019     |
| Alcoholic Liver Diseases | Q16665  | HIF1A    | 0.327 | 0.923 | 0.21      | 2006      | 2018     |
| Alcoholic Liver Diseases | P09341  | CXCL1    | 0.449 | 0.923 | 0.21      | 1999      | 2019     |
| Alcoholic Liver Diseases | Q03135  | CAV1     | 0.388 | 0.885 | 0.2       | 2013      | 2013     |
| Alcoholic Liver Diseases | P24557  | TBXAS1   | 0.619 | 0.615 | 0.2       | 1997      | 1997     |
| Alcoholic Liver Diseases | P19875  | CXCL2    | 0.513 | 0.885 | 0.2       | 1999      | 1999     |
| Alcoholic Liver Diseases | P80162  | CXCL6    | 0.582 | 0.692 | 0.2       | 1999      | 1999     |
| Alcoholic Liver Diseases | P01344  | IGF2     | 0.39  | 0.885 | 0.2       | 2008      | 2008     |
| Alcoholic Liver Diseases | Q96H72  | SLC39A13 | 0.666 | 0.538 | 0.2       | 2015      | 2015     |
| Alcoholic Liver Diseases | P14780  | MMP9     | 0.305 | 0.923 | 0.2       | 2007      | 2007     |
| Alcoholic Liver Diseases | P13987  | CD59     | 0.469 | 0.808 | 0.2       | 2002      | 2002     |
| Alcoholic Liver Diseases | P14174  | MIF      | 0.412 | 0.885 | 0.2       | 2001      | 2001     |
| Alcoholic Liver Diseases | O00487  | PSMD14   | 0.716 | 0.308 | 0.2       | 2009      | 2009     |
| Alcoholic Liver Diseases | P26842  | CD27     | 0.517 | 0.692 | 0.2       | 2006      | 2006     |
| Alcoholic Liver Diseases | Q9Y5K5  | UCHL5    | 0.695 | 0.346 | 0.2       | 2009      | 2009     |
| Alcoholic Liver Diseases | P06858  | LPL      | 0.474 | 0.808 | 0.2       | 2017      | 2017     |
| Alcoholic Liver Diseases | P00480  | OTC      | 0.565 | 0.846 | 0.2       | 2009      | 2009     |
| Alcoholic Liver Diseases | P05198  | EIF2S1   | 0.587 | 0.692 | 0.2       | 2010      | 2010     |
| Alcoholic Liver Diseases | P05091  | ALDH2    | 0.457 | 0.885 | 0.09      | 1988      | 2004     |
| Alcoholic Liver Diseases | P81172  | HAMP     | 0.433 | 0.846 | 0.07      | 2007      | 2014     |
| Alcoholic Liver Diseases | O00206  | TLR4     | 0.321 | 0.962 | 0.07      | 2011      | 2019     |
| Alcoholic Liver Diseases | P08571  | CD14     | 0.392 | 0.885 | 0.06      | 2001      | 2016     |
| Alcoholic Liver Diseases | P09488  | GSTM1    | 0.38  | 0.923 | 0.05      | 1994      | 2016     |
| Alcoholic Liver Diseases | P22301  | IL10     | 0.281 | 0.923 | 0.05      | 2000      | 2016     |
| Alcoholic Liver Diseases | P14550  | AKR1A1   | 0.51  | 0.846 | 0.05      | 1993      | 2006     |
| Alcoholic Liver Diseases | P00325  | ADH1B    | 0.502 | 0.846 | 0.05      | 1988      | 2016     |
| Alcoholic Liver Diseases | P05231  | IL6      | 0.248 | 0.962 | 0.04      | 2002      | 2014     |
| Alcoholic Liver Diseases | Q96EB6  | SIRT1    | 0.378 | 0.885 | 0.04      | 2014      | 2020     |
| Alcoholic Liver Diseases | P00326  | ADH1C    | 0.547 | 0.731 | 0.04      | 1997      | 2010     |
| Alcoholic Liver Diseases | Q9BZW4  | TM6SF2   | 0.638 | 0.462 | 0.04      | 2018      | 2019     |
| Alcoholic Liver Diseases | P40763  | STAT3    | 0.32  | 0.923 | 0.03      | 2003      | 2014     |
| Alcoholic Liver Diseases | P01137  | TGFB1    | 0.287 | 0.962 | 0.03      | 2002      | 2008     |
| Alcoholic Liver Diseases | Q07869  | PPARA    | 0.432 | 0.885 | 0.03      | 2008      | 2018     |
| Alcoholic Liver Diseases | P24298  | GPT      | 0.403 | 0.923 | 0.03      | 2017      | 2019     |

|                          |        |          |       |       |      |      |      |
|--------------------------|--------|----------|-------|-------|------|------|------|
| Alcoholic Liver Diseases | P01185 | AVP      | 0.437 | 0.846 | 0.03 | 1993 | 2006 |
| Alcoholic Liver Diseases | P04439 | HLA-A    | 0.37  | 0.846 | 0.03 | 1977 | 1988 |
| Alcoholic Liver Diseases | O60760 | HPGDS    | 0.388 | 0.923 | 0.03 | 1996 | 2011 |
| Alcoholic Liver Diseases | P13500 | CCL2     | 0.321 | 0.962 | 0.03 | 1999 | 2017 |
| Alcoholic Liver Diseases | Q16236 | NFE2L2   | 0.357 | 0.885 | 0.03 | 2014 | 2018 |
| Alcoholic Liver Diseases | Q9Y572 | RIPK3    | 0.497 | 0.885 | 0.02 | 2013 | 2014 |
| Alcoholic Liver Diseases | P60709 | ACTB     | 0.325 | 0.923 | 0.02 | 1985 | 2011 |
| Alcoholic Liver Diseases | P18510 | IL1RN    | 0.373 | 0.923 | 0.02 | 1998 | 2005 |
| Alcoholic Liver Diseases | Q15848 | ADIPOQ   | 0.376 | 0.885 | 0.02 | 2015 | 2018 |
| Alcoholic Liver Diseases | P10145 | CXCL8    | 0.31  | 0.962 | 0.02 | 2009 | 2019 |
| Alcoholic Liver Diseases | Q96RI1 | NR1H4    | 0.513 | 0.808 | 0.02 | 2018 | 2019 |
| Alcoholic Liver Diseases | P30711 | GSTT1    | 0.393 | 0.923 | 0.02 | 2005 | 2005 |
| Alcoholic Liver Diseases |        | MIR21    | 0.363 | 0.846 | 0.02 | 2014 | 2018 |
| Alcoholic Liver Diseases | P01583 | IL1A     | 0.333 | 0.962 | 0.02 | 2005 | 2019 |
| Alcoholic Liver Diseases | P31749 | AKT1     | 0.311 | 0.962 | 0.02 | 2018 | 2019 |
| Alcoholic Liver Diseases | Q7Z5P4 | HSD17B13 | 0.623 | 0.538 | 0.02 | 2019 | 2019 |
| Alcoholic Liver Diseases | P21554 | CNR1     | 0.446 | 0.808 | 0.02 | 2017 | 2019 |
| Alcoholic Liver Diseases | Q06546 | GABPA    | 0.379 | 0.885 | 0.02 | 2018 | 2018 |
| Alcoholic Liver Diseases | P04179 | SOD2     | 0.379 | 0.923 | 0.02 | 2016 | 2016 |
| Alcoholic Liver Diseases | P08246 | ELANE    | 0.447 | 0.846 | 0.02 | 2012 | 2017 |
| Alcoholic Liver Diseases | Q9GZX6 | IL22     | 0.393 | 0.885 | 0.02 | 2013 | 2018 |
| Alcoholic Liver Diseases | P33897 | ABCD1    | 0.563 | 0.731 | 0.02 | 2000 | 2013 |
| Alcoholic Liver Diseases | Q92187 | ST8SIA4  | 0.546 | 0.846 | 0.02 | 1997 | 2004 |
| Alcoholic Liver Diseases | P02771 | AFP      | 0.429 | 0.885 | 0.02 | 2019 | 2019 |
| Alcoholic Liver Diseases | Q6WCQ1 | MPRIIP   | 0.556 | 0.885 | 0.02 | 2013 | 2014 |
| Alcoholic Liver Diseases | Q8NBJ4 | GOLM1    | 0.56  | 0.692 | 0.02 | 2004 | 2013 |
| Alcoholic Liver Diseases | P09429 | HMGB1    | 0.368 | 0.923 | 0.02 | 2014 | 2019 |
| Alcoholic Liver Diseases | P42336 | PIK3CA   | 0.292 | 0.923 | 0.01 | 2018 | 2018 |
| Alcoholic Liver Diseases | Q13427 | PPIG     | 0.497 | 0.846 | 0.01 | 2004 | 2004 |
| Alcoholic Liver Diseases | Q99572 | P2RX7    | 0.45  | 0.808 | 0.01 | 2018 | 2018 |
| Alcoholic Liver Diseases | P54278 | PMS2     | 0.484 | 0.808 | 0.01 | 2014 | 2014 |
| Alcoholic Liver Diseases | Q9NPH5 | NOX4     | 0.471 | 0.885 | 0.01 | 2017 | 2017 |
| Alcoholic Liver Diseases | P48736 | PIK3CG   | 0.32  | 0.885 | 0.01 | 2018 | 2018 |
| Alcoholic Liver Diseases | O60315 | ZEB2     | 0.471 | 0.808 | 0.01 | 2018 | 2018 |
| Alcoholic Liver Diseases | P54296 | MYOM2    | 0.57  | 0.692 | 0.01 | 2015 | 2015 |
| Alcoholic Liver Diseases | Q9UBH6 | XPR1     | 0.488 | 0.731 | 0.01 | 2018 | 2018 |
| Alcoholic Liver Diseases | P37231 | PPARG    | 0.358 | 0.885 | 0.01 | 2017 | 2017 |
| Alcoholic Liver Diseases | Q9GZP9 | DERL2    | 0.617 | 0.615 | 0.01 | 2019 | 2019 |
| Alcoholic Liver Diseases | Q7LGC8 | CHST3    | 0.517 | 0.846 | 0.01 | 2008 | 2008 |
| Alcoholic Liver Diseases | O00329 | PIK3CD   | 0.319 | 0.885 | 0.01 | 2018 | 2018 |
| Alcoholic Liver Diseases | Q9NRA0 | SPHK2    | 0.546 | 0.731 | 0.01 | 2019 | 2019 |
| Alcoholic Liver Diseases | P42338 | PIK3CB   | 0.322 | 0.885 | 0.01 | 2018 | 2018 |
| Alcoholic Liver Diseases | Q9HD89 | RETN     | 0.454 | 0.808 | 0.01 | 2018 | 2018 |
| Alcoholic Liver Diseases | Q8TC59 | PIWIL2   | 0.612 | 0.577 | 0.01 | 2019 | 2019 |

|                          |        |         |       |       |      |      |      |
|--------------------------|--------|---------|-------|-------|------|------|------|
| Alcoholic Liver Diseases | P62195 | PSMC5   | 0.686 | 0.538 | 0.01 | 1997 | 1997 |
| Alcoholic Liver Diseases | P08922 | ROS1    | 0.439 | 0.885 | 0.01 | 2017 | 2017 |
| Alcoholic Liver Diseases | Q13586 | STIM1   | 0.501 | 0.808 | 0.01 | 2018 | 2018 |
| Alcoholic Liver Diseases | Q9H9Z2 | LIN28A  | 0.523 | 0.731 | 0.01 | 2017 | 2017 |
| Alcoholic Liver Diseases |        | MIR570  | 0.682 | 0.346 | 0.01 | 2015 | 2015 |
| Alcoholic Liver Diseases | P01135 | TGFA    | 0.432 | 0.885 | 0.01 | 2003 | 2003 |
| Alcoholic Liver Diseases | O60603 | TLR2    | 0.361 | 0.923 | 0.01 | 2019 | 2019 |
| Alcoholic Liver Diseases | Q96N66 | MBOAT7  | 0.612 | 0.5   | 0.01 | 2018 | 2018 |
| Alcoholic Liver Diseases | P13501 | CCL5    | 0.403 | 0.885 | 0.01 | 2003 | 2003 |
| Alcoholic Liver Diseases |        | KRT8P3  | 0.644 | 0.538 | 0.01 | 2006 | 2006 |
| Alcoholic Liver Diseases | P09936 | UCHL1   | 0.482 | 0.885 | 0.01 | 2015 | 2015 |
| Alcoholic Liver Diseases | P55851 | UCP2    | 0.493 | 0.808 | 0.01 | 2017 | 2017 |
| Alcoholic Liver Diseases | P06132 | UROD    | 0.521 | 0.769 | 0.01 | 1976 | 1976 |
| Alcoholic Liver Diseases | P17861 | XBP1    | 0.477 | 0.846 | 0.01 | 2009 | 2009 |
| Alcoholic Liver Diseases | P98155 | VLDLR   | 0.558 | 0.692 | 0.01 | 2014 | 2014 |
| Alcoholic Liver Diseases | Q96DB2 | HDAC11  | 0.636 | 0.654 | 0.01 | 2017 | 2017 |
| Alcoholic Liver Diseases | O14990 | PPP1R2C | 0.478 | 0.846 | 0.01 | 1998 | 1998 |
| Alcoholic Liver Diseases | O14497 | ARID1A  | 0.455 | 0.846 | 0.01 | 2017 | 2017 |
| Alcoholic Liver Diseases | P26447 | S100A4  | 0.448 | 0.769 | 0.01 | 2019 | 2019 |
| Alcoholic Liver Diseases | P0DJI8 | SAA1    | 0.513 | 0.808 | 0.01 | 2015 | 2015 |
| Alcoholic Liver Diseases | P0DJI9 | SAA2    | 0.568 | 0.731 | 0.01 | 2015 | 2015 |
| Alcoholic Liver Diseases | Q8TB45 | DEPTOR  | 0.626 | 0.654 | 0.01 | 2018 | 2018 |
| Alcoholic Liver Diseases | Q13309 | SKP2    | 0.492 | 0.808 | 0.01 | 1997 | 1997 |
| Alcoholic Liver Diseases | P16581 | SELE    | 0.447 | 0.808 | 0.01 | 2013 | 2013 |
| Alcoholic Liver Diseases | Q5T4F7 | SFRP5   | 0.559 | 0.692 | 0.01 | 2016 | 2016 |
| Alcoholic Liver Diseases | O95760 | IL33    | 0.409 | 0.885 | 0.01 | 2019 | 2019 |
| Alcoholic Liver Diseases | O75469 | NR1I2   | 0.418 | 0.846 | 0.01 | 2018 | 2018 |
| Alcoholic Liver Diseases | Q6DKJ4 | NXN     | 0.584 | 0.577 | 0.01 | 2018 | 2018 |
| Alcoholic Liver Diseases | O95342 | ABCB11  | 0.566 | 0.654 | 0.01 | 2012 | 2012 |
| Alcoholic Liver Diseases | P15907 | ST6GAL1 | 0.569 | 0.731 | 0.01 | 2008 | 2008 |
| Alcoholic Liver Diseases | P29466 | CASP1   | 0.413 | 0.885 | 0.01 | 1997 | 1997 |
| Alcoholic Liver Diseases | Q8NER1 | TRPV1   | 0.446 | 0.885 | 0.01 | 2015 | 2015 |
| Alcoholic Liver Diseases | P11245 | NAT2    | 0.451 | 0.885 | 0.01 | 2002 | 2002 |
| Alcoholic Liver Diseases | P04798 | CYP1A1  | 0.436 | 0.846 | 0.01 | 1994 | 1994 |
| Alcoholic Liver Diseases | P12821 | ACE     | 0.328 | 0.923 | 0.01 | 2018 | 2018 |
| Alcoholic Liver Diseases | P35638 | DDIT3   | 0.467 | 0.846 | 0.01 | 2013 | 2013 |
| Alcoholic Liver Diseases | P30556 | AGTR1   | 0.423 | 0.846 | 0.01 | 2012 | 2012 |
| Alcoholic Liver Diseases | P18146 | EGR1    | 0.433 | 0.923 | 0.01 | 2017 | 2017 |
| Alcoholic Liver Diseases | P07099 | EPHX1   | 0.5   | 0.846 | 0.01 | 2000 | 2000 |
| Alcoholic Liver Diseases | P31751 | AKT2    | 0.474 | 0.769 | 0.01 | 2019 | 2019 |
| Alcoholic Liver Diseases | P00352 | ALDH1A1 | 0.46  | 0.846 | 0.01 | 1988 | 1988 |
| Alcoholic Liver Diseases | P30837 | ALDH1B1 | 0.691 | 0.462 | 0.01 | 1989 | 1989 |
| Alcoholic Liver Diseases | P15121 | AKR1B1  | 0.491 | 0.885 | 0.01 | 2017 | 2017 |
| Alcoholic Liver Diseases | Q9NTG7 | SIRT3   | 0.488 | 0.731 | 0.01 | 2019 | 2019 |

|                          |           |          |       |       |      |      |      |
|--------------------------|-----------|----------|-------|-------|------|------|------|
| Alcoholic Liver Diseases | Q15393    | SF3B3    | 0.792 | 0.231 | 0.01 | 2018 | 2018 |
| Alcoholic Liver Diseases | P16050    | ALOX15   | 0.502 | 0.846 | 0.01 | 2017 | 2017 |
| Alcoholic Liver Diseases | P42345    | MTOR     | 0.343 | 0.885 | 0.01 | 2017 | 2017 |
| Alcoholic Liver Diseases | P19526    | FUT1     | 0.541 | 0.692 | 0.01 | 2018 | 2018 |
| Alcoholic Liver Diseases | Q6ZMG9    | CERS6    | 0.65  | 0.615 | 0.01 | 2018 | 2018 |
| Alcoholic Liver Diseases | Q8NBP7    | PCSK9    | 0.482 | 0.808 | 0.01 | 2019 | 2019 |
| Alcoholic Liver Diseases | P16410    | CTLA4    | 0.369 | 0.923 | 0.01 | 2004 | 2004 |
| Alcoholic Liver Diseases | P29279    | CCN2     | 0.399 | 0.846 | 0.01 | 2011 | 2011 |
| Alcoholic Liver Diseases | O14594    | NCAN     | 0.67  | 0.5   | 0.01 | 2014 | 2014 |
| Alcoholic Liver Diseases | Q9Y243    | AKT3     | 0.512 | 0.808 | 0.01 | 2019 | 2019 |
| Alcoholic Liver Diseases |           | PSC      | 0.603 | 0.731 | 0.01 | 2013 | 2013 |
| Alcoholic Liver Diseases | P43490    | NAMPT    | 0.502 | 0.808 | 0.01 | 2019 | 2019 |
|                          | P42771;Q8 |          |       |       |      |      | 2014 |
| Alcoholic Liver Diseases | N726      | CDKN2A   | 0.3   | 0.885 | 0.01 | 2014 |      |
| Alcoholic Liver Diseases | P19883    | FST      | 0.513 | 0.731 | 0.01 | 2018 | 2018 |
| Alcoholic Liver Diseases | P06731    | CEACAM5  | 0.42  | 0.846 | 0.01 | 1983 | 1983 |
| Alcoholic Liver Diseases | Q96TA2    | YME1L1   | 0.633 | 0.654 | 0.01 | 2018 | 2018 |
|                          |           | TNFRSF13 |       |       |      |      | 2019 |
| Alcoholic Liver Diseases | Q96RJ3    | C        | 0.54  | 0.731 | 0.01 | 2019 |      |
| Alcoholic Liver Diseases | Q99541    | PLIN2    | 0.564 | 0.692 | 0.01 | 2018 | 2018 |
| Alcoholic Liver Diseases | P07327    | ADH1A    | 0.647 | 0.577 | 0.01 | 2010 | 2010 |
| Alcoholic Liver Diseases | P08319    | ADH4     | 0.641 | 0.462 | 0.01 | 2004 | 2004 |
| Alcoholic Liver Diseases | P11766    | ADH5     | 0.604 | 0.731 | 0.01 | 2004 | 2004 |
| Alcoholic Liver Diseases | Q6UW15    | REG3G    | 0.716 | 0.385 | 0.01 | 2019 | 2019 |
| Alcoholic Liver Diseases | P35318    | ADM      | 0.436 | 0.808 | 0.01 | 2018 | 2018 |
| Alcoholic Liver Diseases | Q86UG4    | SLCO6A1  | 0.412 | 0.885 | 0.01 | 1996 | 1996 |
| Alcoholic Liver Diseases | Q5JSL3    | DOCK11   | 0.606 | 0.731 | 0.01 | 2018 | 2018 |
| Alcoholic Liver Diseases | Q16539    | MAPK14   | 0.379 | 0.923 | 0.01 | 2003 | 2003 |
| Alcoholic Liver Diseases | Q9ULY5    | CLEC4E   | 0.695 | 0.5   | 0.01 | 2018 | 2018 |
| Alcoholic Liver Diseases | Q9NSA1    | FGF21    | 0.485 | 0.769 | 0.01 | 2017 | 2017 |
| Alcoholic Liver Diseases | P05783    | KRT18    | 0.53  | 0.692 | 0.01 | 2017 | 2017 |
| Alcoholic Liver Diseases | P41159    | LEP      | 0.349 | 0.846 | 0.01 | 2018 | 2018 |
| Alcoholic Liver Diseases | O00327    | ARNTL    | 0.51  | 0.885 | 0.01 | 2018 | 2018 |
| Alcoholic Liver Diseases |           | MIR122   | 0.468 | 0.808 | 0.01 | 2019 | 2019 |
| Alcoholic Liver Diseases |           | MIR155   | 0.384 | 0.885 | 0.01 | 2017 | 2017 |
| Alcoholic Liver Diseases |           | MIR200A  | 0.519 | 0.808 | 0.01 | 2018 | 2018 |
| Alcoholic Liver Diseases |           | MIR203A  | 0.471 | 0.808 | 0.01 | 2018 | 2018 |
| Alcoholic Liver Diseases |           | MIR212   | 0.535 | 0.808 | 0.01 | 2008 | 2008 |
| Alcoholic Liver Diseases |           | MIR223   | 0.433 | 0.808 | 0.01 | 2017 | 2017 |
| Alcoholic Liver Diseases |           | MIR30E   | 0.576 | 0.769 | 0.01 | 2017 | 2017 |
| Alcoholic Liver Diseases |           | MIR34A   | 0.421 | 0.846 | 0.01 | 2012 | 2012 |
| Alcoholic Liver Diseases | P32121    | ARRB2    | 0.561 | 0.769 | 0.01 | 2018 | 2018 |
| Alcoholic Liver Diseases | Q00266    | MAT1A    | 0.582 | 0.577 | 0.01 | 2005 | 2005 |
| Alcoholic Liver Diseases | P30301    | MIP      | 0.507 | 0.846 | 0.01 | 1999 | 1999 |

|                          |        |         |       |       |      |      |      |
|--------------------------|--------|---------|-------|-------|------|------|------|
| Alcoholic Liver Diseases | P43246 | MSH2    | 0.406 | 0.808 | 0.01 | 2014 | 2014 |
| Alcoholic Liver Diseases | Q02817 | MUC2    | 0.486 | 0.808 | 0.01 | 2013 | 2013 |
| Alcoholic Liver Diseases | Q16621 | NFE2    | 0.628 | 0.577 | 0.01 | 1997 | 1997 |
| Alcoholic Liver Diseases | P05787 | KRT8    | 0.517 | 0.654 | 0.01 | 2006 | 2006 |
| Alcoholic Liver Diseases | Q9Y2Q3 | GSTK1   | 0.412 | 0.885 | 0.01 | 1996 | 1996 |
| Alcoholic Liver Diseases | Q14653 | IRF3    | 0.517 | 0.808 | 0.01 | 2014 | 2014 |
| Alcoholic Liver Diseases | Q9NZH6 | IL37    | 0.459 | 0.846 | 0.01 | 2018 | 2018 |
| Alcoholic Liver Diseases | O94925 | GLS     | 0.489 | 0.808 | 0.01 | 2007 | 2007 |
| Alcoholic Liver Diseases | O15217 | GSTA4   | 0.678 | 0.462 | 0.01 | 2018 | 2018 |
| Alcoholic Liver Diseases | P09211 | GSTP1   | 0.383 | 0.923 | 0.01 | 2011 | 2011 |
| Alcoholic Liver Diseases | Q9UHD0 | IL19    | 0.558 | 0.769 | 0.01 | 2005 | 2005 |
| Alcoholic Liver Diseases | P52789 | HK2     | 0.515 | 0.769 | 0.01 | 1998 | 1998 |
| Alcoholic Liver Diseases | P06340 | HLA-DOA | 0.509 | 0.808 | 0.01 | 2004 | 2004 |
| Alcoholic Liver Diseases | P11021 | HSPA5   | 0.434 | 0.885 | 0.01 | 2014 | 2014 |
| Alcoholic Liver Diseases | P98160 | HSPG2   | 0.438 | 0.885 | 0.01 | 2018 | 2018 |
| Alcoholic Liver Diseases | P02647 | APOA1   | 0.429 | 0.885 | 0.01 | 2005 | 2005 |
| Alcoholic Liver Diseases | Q8TDS4 | HCAR2   | 0.631 | 0.692 | 0.01 | 2018 | 2018 |
| Alcoholic Liver Diseases | Q5NUL3 | FFAR4   | 0.621 | 0.577 | 0.01 | 2017 | 2017 |
| Alcoholic Liver Diseases | P14778 | IL1R1   | 0.509 | 0.769 | 0.01 | 2018 | 2018 |
| Alcoholic Liver Diseases | P60568 | IL2     | 0.336 | 0.885 | 0.01 | 2008 | 2008 |
| Alcoholic Liver Diseases | P40189 | IL6ST   | 0.475 | 0.808 | 0.01 | 2009 | 2009 |
| Alcoholic Liver Diseases | P29460 | IL12B   | 0.48  | 0.885 | 0.01 | 2018 | 2018 |
| Alcoholic Liver Diseases | Q14005 | IL16    | 0.501 | 0.846 | 0.01 | 2018 | 2018 |
| Alcoholic Liver Diseases | P19838 | NFKB1   | 0.396 | 0.923 | 0.01 | 2018 | 2018 |

---
